# Supplementary material for: Bioinspired multi-structured hybrid surfaces for directional droplet transport and ultra-efficient atmospheric water collection
Source: Royal Society of Chemistry journal article supplement (doi:10.1039/d5ta05639j), 2025-01-01
Supplement: d5ta05639j6.pdf [file d5ta05639j6.pdf]

## Supplementary information

### **Bioinspired multi-structured hybrid surfaces for directional droplet transport and ultra-efficient atmospheric water collection**

*Jing Zhao<sup>1, \*</sup>, Zijin Cheng<sup>1</sup>, Jiangpeng Qu<sup>1</sup>, Yujun Liu<sup>1</sup>, Wenjun Wu<sup>1</sup>, Pengcheng He<sup>1</sup>,  
Jiliang Mo<sup>1, 2</sup>*

*<sup>1</sup>Key Laboratory of Advanced Technologies of Materials (Ministry of Education),  
School of Mechanical Engineering, Southwest Jiaotong University, Chengdu 610031,  
China*

*<sup>2</sup>Technology and Equipment of Rail Transit Operation and Maintenance Key  
Laboratory of Sichuan Province, Sichuan, Chengdu 610031, China*

*\* Corresponding author. E-mail address:*

*jzhao@swjtu.edu.cn (Jing Zhao)*

*\*Corresponding author.*

*E-mail: jzhao@swjtu.edu.cn*

## **Supplementary movie**

**Supplementary movie 1.** Adsorption of droplets on hybrid surface with 1 mm superhydrophilic pore.

**Supplementary movie 2.** Coalescence and adsorption of droplets on pore-corner hybrid surfaces.

**Supplementary movie 3.** The fusion, directional migration, and detachment of droplets on superhydrophilic pore surface.

**Supplementary movie 4.** The fusion, directional migration, and detachment of droplets on pore-corner surface.

**Supplementary movie 5.** The fusion, directional migration, and detachment of droplets on corner guide-channel hybrid surface.
